# Supplementary material
Source: PubMed Central journal article supplement (PMC7005938)
Supplement: jz8b03646_si_001.pdf [file jz8b03646_si_001.pdf]

## Supporting information

# Less is More; Dilution Enhances Optical and Electrical Performance of a TADF Exciplex

*Marco Colella<sup>a</sup>, Andrew Danos<sup>a\*</sup>, Andrew P. Monkman<sup>a\*</sup>*

<sup>a</sup>Department of Physics, Durham University, South Road, DH1 3LE, UK

\*Email: [andrew.danos@durham.ac.uk](mailto:andrew.danos@durham.ac.uk)

\*Email: [a.p.monkman@durham.ac.uk](mailto:a.p.monkman@durham.ac.uk)

### METHODS

**Device fabrication** OLEDs were fabricated on patterned ITO coated glass (VisionTek Systems) with a sheet resistance of 15  $\Omega$ /sq. Oxygen-plasma cleaned substrates were loaded into a Kurt J. Lesker Super Spectros deposition chamber, and both the small molecule and cathode layers thermally evaporated at pressure below  $10^{-7}$  mbar. The materials used for the production of the devices were: N,N'-di(1-naphthyl)-N,N'-diphenyl-(1,1'-biphenyl)-4,4'-diamine (NPB) as hole injection layer (HIL), 4,4'-(Diphenylsilanediyl)bis(N,N-diphenylaniline) (TSBPA) as hole transporting layer (HTL) and exciplex donor, 2,4,6-tris[3-(diphenylphosphinyl)phenyl]-1,3,5-triazine (PO-T2T) as exciplex acceptor and electron transporting layer (ETL), lithium fluoride (LiF) as electron injection layer, and aluminium

(Al) cathode. 1,3-Bis(triphenylsilyl)benzene (UGH-3) or Bis[2-(diphenylphosphino)phenyl]ether oxide (DPEPO) were used as host materials. NPB, UGH-3 and DPEPO were purchased from Sigma Aldrich and sublimed before use. TSBPA and PO-T2T were purchased from Lumtec and used as received.

**Device characterization** Freshly evaporated devices were encapsulated under inert atmosphere using UV-curable epoxy (DELO Katiobond) along the outer edges of the active area with a glass coverslip. Devices were then transferred into a calibrated 10-inch integrating sphere (Labsphere) and their electrical properties measured using an Agilent Source Measure Unit (6632B). Emission spectra were simultaneously measured using a calibrated fibre coupled spectrometer (Ocean optics USB4000).

**Optical film characterization** All photophysical measurement were performed on 100 nm thick vacuum deposited films on sapphire substrates to avoid any formation of aggregates. Steady-state absorption and emission spectra were acquired using a UV-3600 Shimadzu spectrophotometer and a Jobin Yvon Horiba Fluoromax-3 fluorimeter, respectively. Photoluminescence quantum yields were measured using a calibrated integrating sphere (Labsphere) with a 340 nm fibre coupled LED (Thorlabs M340L4) as excitation source and a fiber coupled USB UV-Vis spectrometer (Ocean Optics HR2000) for detection. The sphere was flushed with a stream of dry nitrogen gas for at least 30 minutes before measurement to prevent oxygen quenching of triplets.

**Time-resolved emission spectra** Spectra for decay series were obtained by exciting the sample under vacuum with a sub-nanosecond pulsewidth Nd:YAG laser (EKSPLA), using ~100  $\mu$ J of 355 nm output. A 337 nm nitrogen laser and ND filter wheel were used for power

dependence series. Sample emission was detected with a spectrograph and sub-nanosecond gated iCCD camera (Stanford Computer Optics).

## SUPPORTING FIGURES

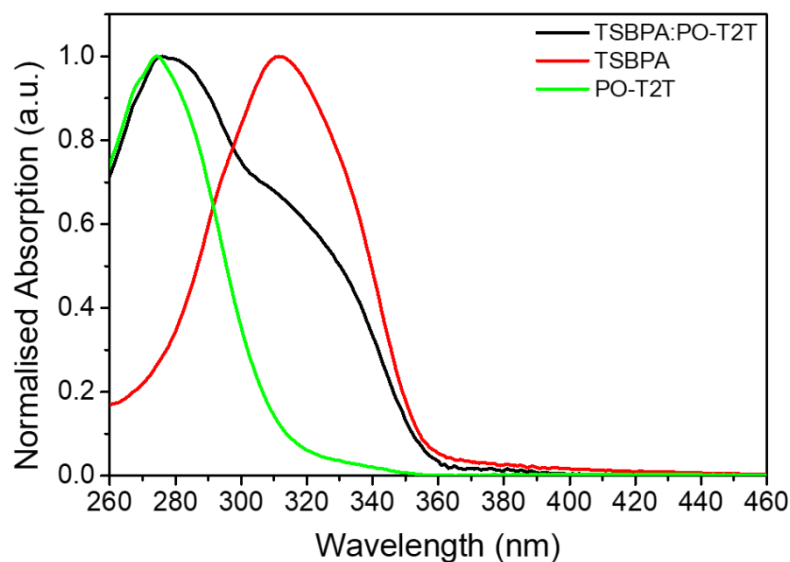

**Figure S1** Normalised absorption spectra of evaporated neat TSBPA, neat PO-T2T and TSBPA:PO-T2T films.

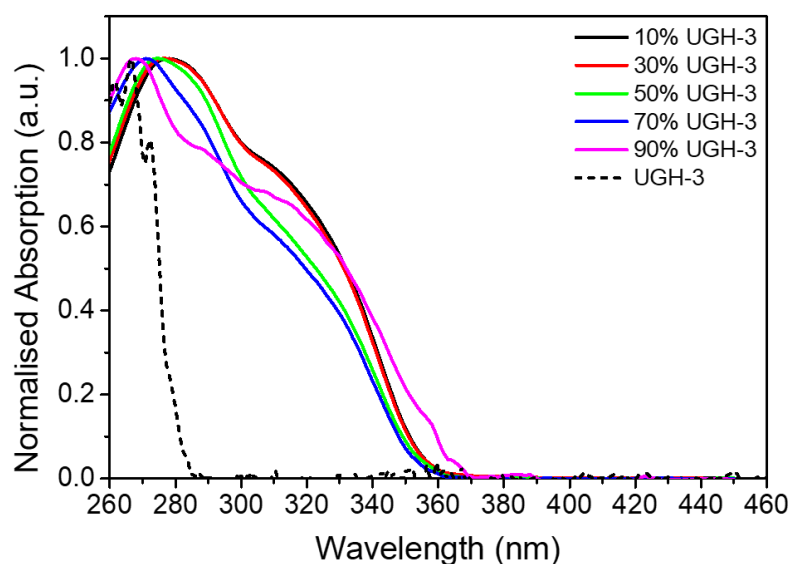

**Figure S2** Absorption spectra of evaporated TSBPA:PO-T2T exciplex films with increasing vol% of UGH-3.

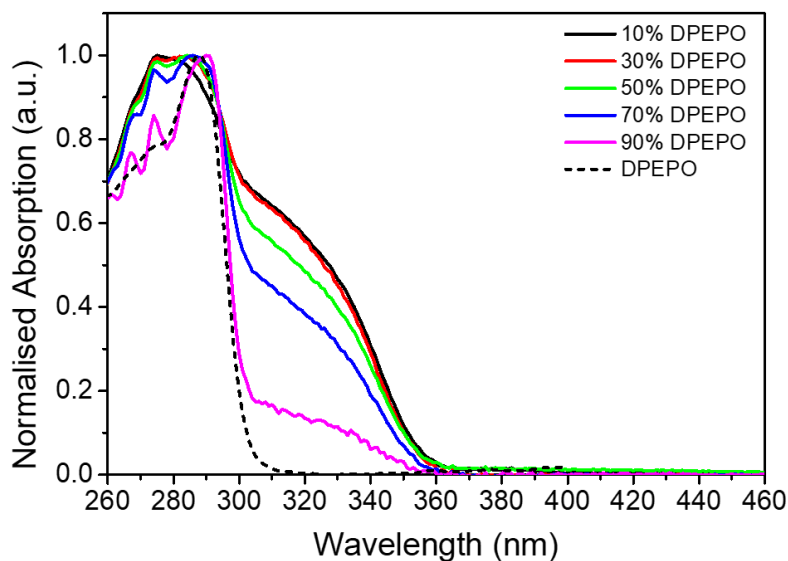

**Figure S3** Absorption spectra of evaporated TSBPA:PO-T2T exciplex films with increasing vol% of DPEPO.

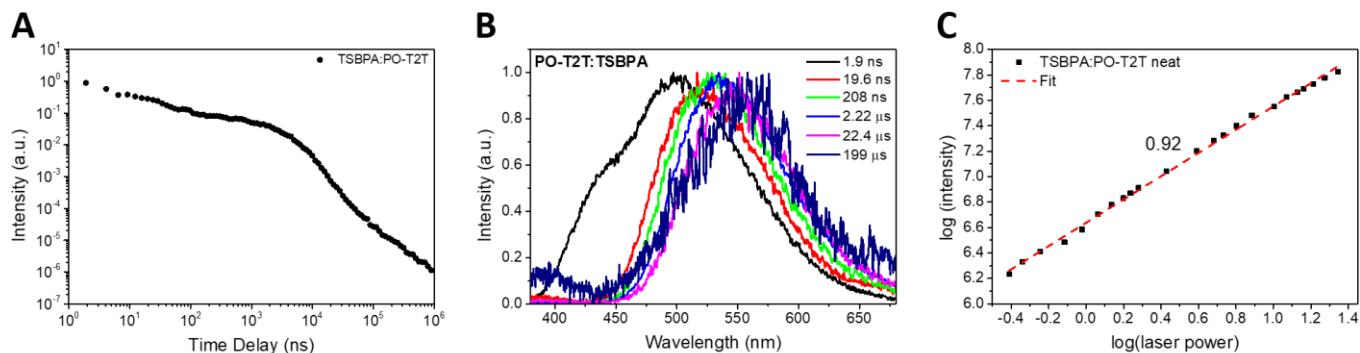

**Figure S4** (A) Room temperature photoluminescence decays of evaporated TSBPA:PO-T2T exciplex film. (B) Photoluminescence spectra of TSBPA:PO-T2T 1:1 ratio evaporated film at different delay times. (C) Linear fit of the log of the integrated intensity vs log of the laser power of TSBPA:PO-T2T 1:1 ratio evaporated film.

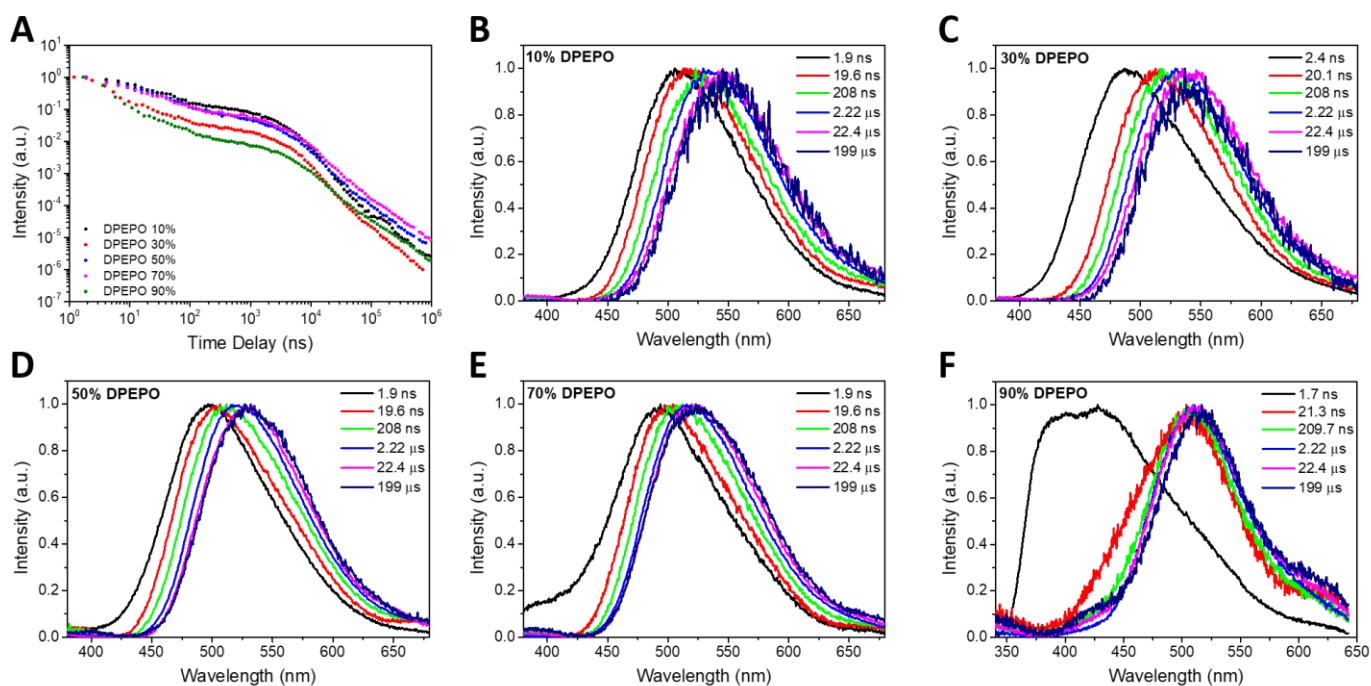

**Figure S5** (A) Room temperature photoluminescence decays of evaporated TSBPA:PO-T2T exciplex films with increasing vol% of DPEPO. (B-F) Photoluminescence spectra of TSBPA:PO-T2T 1:1 ratio diluted in 10-90 vol% DPEPO evaporated film at different delay times.

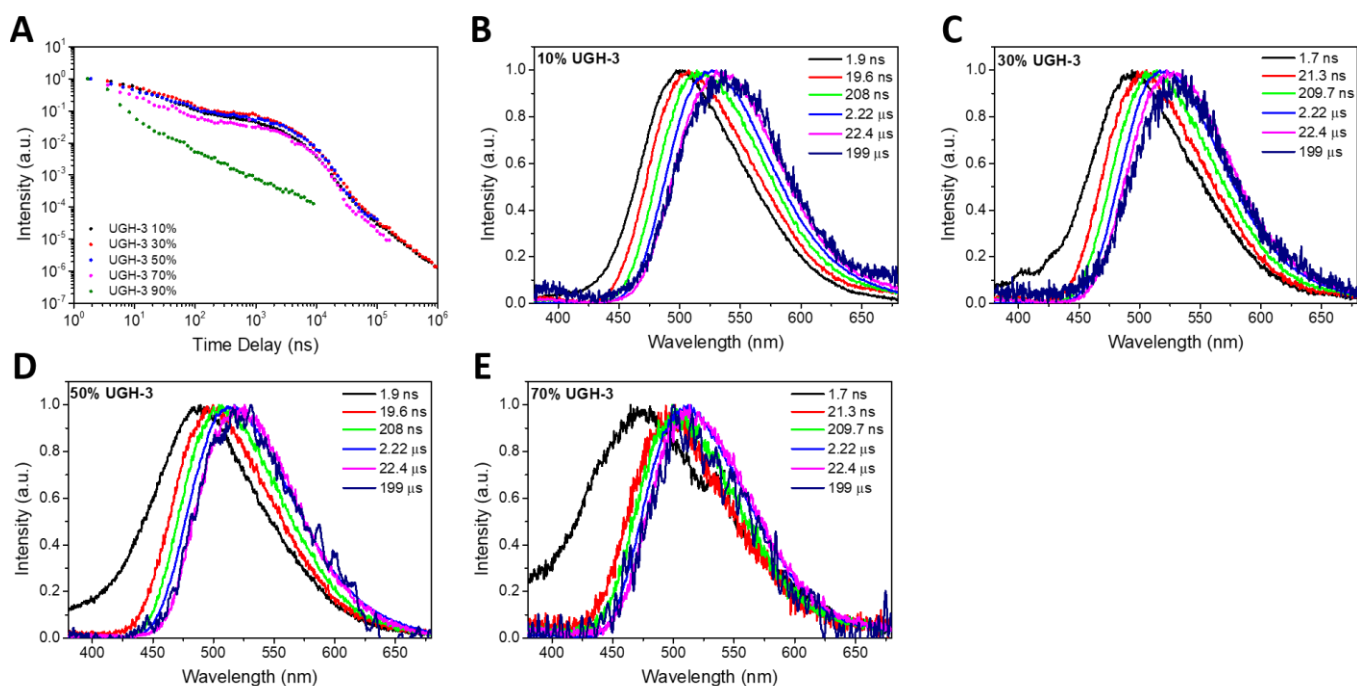

**Figure S6** (A) Room temperature photoluminescence decays of evaporated TSBPA:PO-T2T exciplex films with increasing vol% of UGH-3. (B-E) Photoluminescence spectra of TSBPA:PO-T2T 1:1 ratio diluted in 10-90 vol% UGH-3 evaporated film at different delay times.

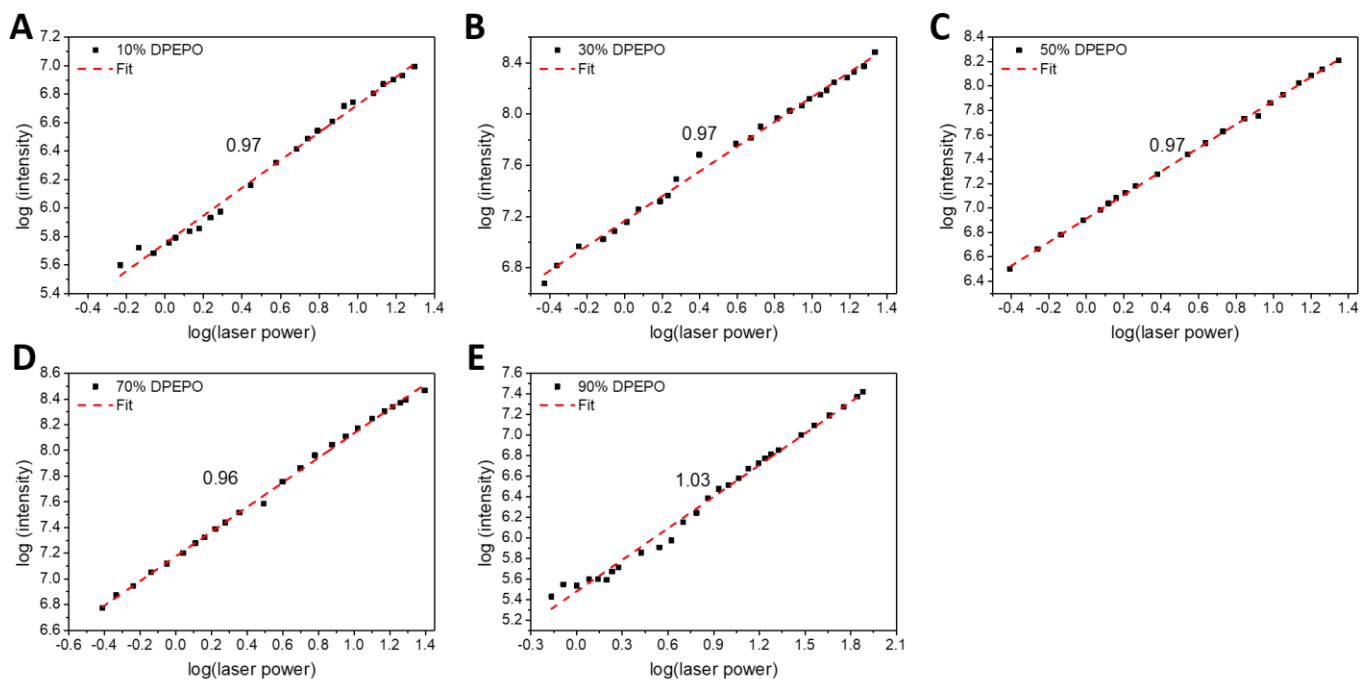

**Figure S7 (A-E)** Linear fit of the log of the integrated intensity vs log of the laser power of TSBPA:PO-T2T 1:1 ratio evaporated film diluted in 10-90 vol% DPEPO.

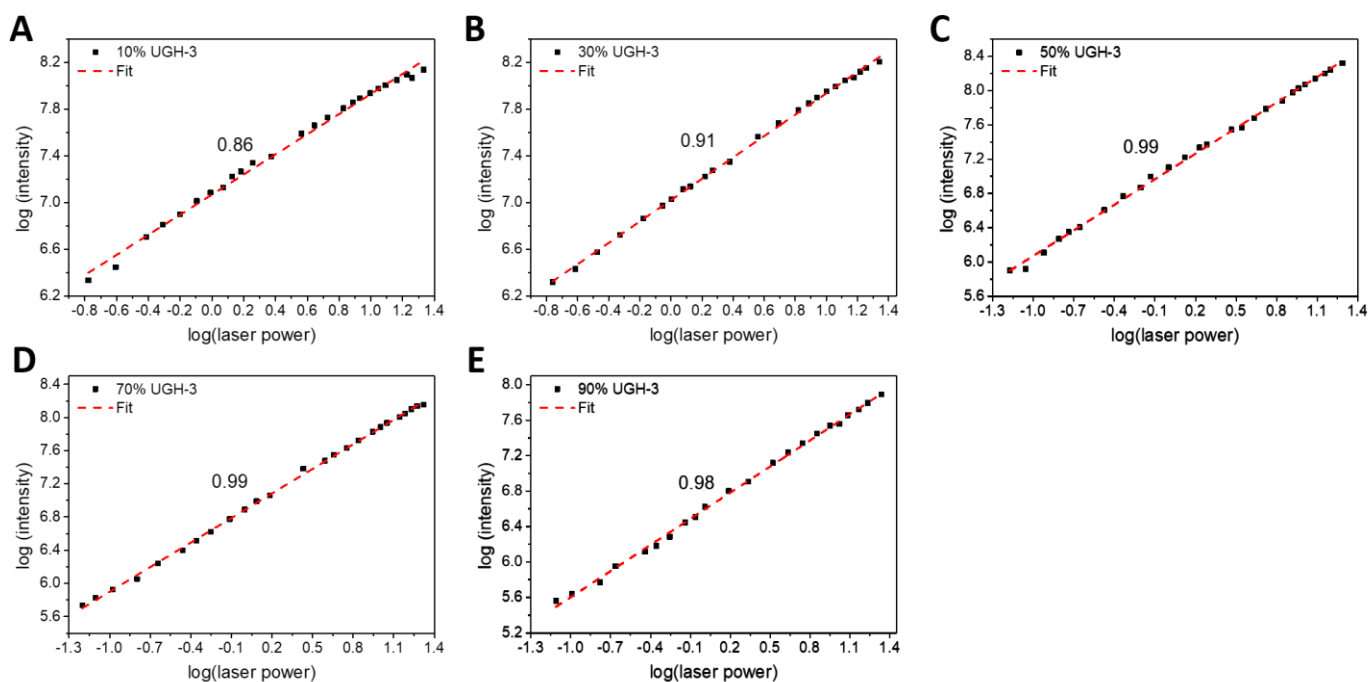

**Figure S8 (A-E)** Linear fit of the log of the integrated intensity vs log of the laser power of TSBPA:PO-T2T 1:1 ratio evaporated film diluted in 10-90 vol% UGH-3.

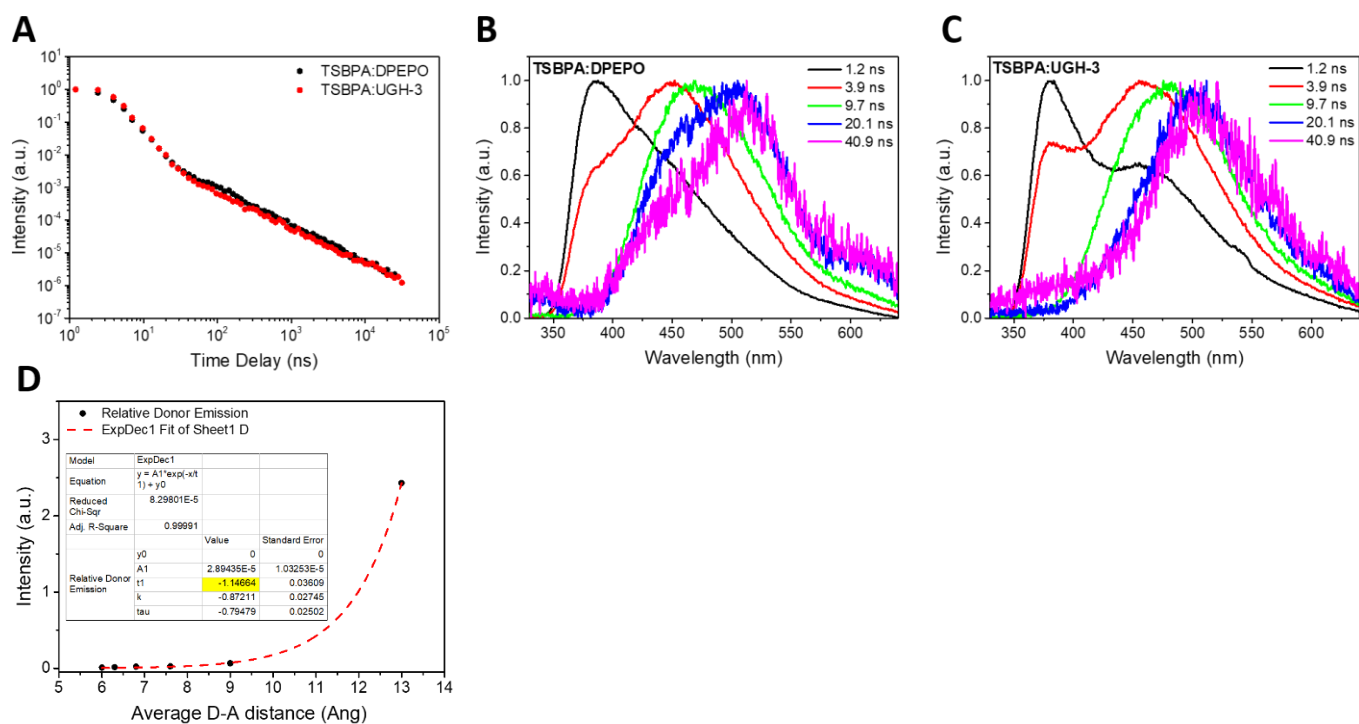

**Figure S9** (A) Room temperature photoluminescence decays of evaporated TSBPA:DPEPO and TSBPA:UGH-3 exciplex films. Photoluminescence spectra of (B) TSBPA:DPEPO and (C) TSBPA:UGH-3 1:1 ratio evaporated films at different delay times. (D) Distance dependence of residual donor emission (from main text Figure 2, UGH-3 series) corrected for differing exciplex PLQYs.
